# 1 Genome-wide meta-analysis of iron status biomarkers and the 2 effect of iron on all-cause mortality in HUNT

3 Marta R Moksnes,<sup>1,†</sup> Ailin Falkmo Hansen,<sup>1</sup> Sarah E Graham,<sup>2</sup> Sarah A Gagliano Taliun,<sup>3,4</sup> Kuan-  
4 Han Wu<sup>5</sup>, Wei Zhou,<sup>6,7</sup> Ketil Thorstensen,<sup>8</sup> Lars G Fritsche,<sup>9,10</sup> Dipender Gill,<sup>11,12,13,14</sup> Amy  
5 Mason,<sup>15,16</sup> Francesco Cucca,<sup>17,18</sup> David Schlessinger,<sup>19</sup> Gonçalo R. Abecasis,<sup>10</sup> Stephen  
6 Burgess,<sup>15,20</sup> Bjørn Olav Åsvold,<sup>1,21,22</sup> Jonas B Nielsen,<sup>1,2,23,24</sup> Kristian Hveem,<sup>1,22,\*</sup> Cristen J  
7 Willer,<sup>1,2,5,25,\*</sup> Ben M Brumpton.<sup>1,22,26,†\*</sup>

8

9

10

11

12

13

14

15

16

17

18

19

20

21

22

23

24

25

26

27

28

29

30

31

32

33

34

35

36

37

38

39

40

41

42

43

44

45

1 K.G. Jebsen Center for Genetic Epidemiology, Department of Public Health and Nursing, Faculty of Medicine and Health Sciences, NTNU – Norwegian University of Science and Technology, Trondheim, Norway

2 Division of Cardiovascular Medicine, Department of Internal Medicine, University of Michigan, Ann Arbor, MI, USA

3 Faculty of Medicine, University of Montréal, Montréal, QC H3T 1J4, Canada

4 Montréal Heart Institute, Montréal, QC H1T 1C8, Canada

5 Department of Computational Medicine and Bioinformatics, University of Michigan, Ann Arbor, MI, USA

6 Analytic and Translational Genetics Unit, Department of Medicine, Massachusetts General Hospital, Boston, MA, USA

7 Stanley Center for Psychiatric Research, Broad Institute of MIT and Harvard, Cambridge, MA, USA

8 Department of Clinical Chemistry, St. Olavs hospital Trondheim University Hospital, Trondheim, Norway

9 Department of Biostatistics, University of Michigan School of Public Health, Ann Arbor, MI, USA

10 Center for Statistical Genetics, University of Michigan School of Public Health, Ann Arbor, MI, USA

11 Department of Epidemiology and Biostatistics, School of Public Health, Imperial College London, London, UK

12 Clinical Pharmacology and Therapeutics Section, Institute for Infection and Immunity, St George's, University of London, London, UK

13 Clinical Pharmacology Group, Pharmacy and Medicines Directorate, St George's University Hospitals NHS Foundation Trust, London, UK

14 Novo Nordisk Research Centre Oxford, Old Road Campus, Oxford, UK

15 Department of Public Health and Primary Care, University of Cambridge, Cambridge, UK

16 National Institute for Health Research Cambridge Biomedical Research Centre, University of Cambridge and Cambridge University Hospitals, Cambridge, UK

17 Istituto di Ricerca Genetica e Biomedica, Consiglio Nazionale delle Ricerche (CNR), Cagliari, Italy

18 Dipartimento di Scienze Biomediche, Università degli Studi di Sassari, Sassari, Italy

19 Laboratory of Genetics, National Institute on Aging, US National Institutes of Health, Baltimore, Maryland

20 Medical Research Council Biostatistics Unit, University of Cambridge, Cambridge, UK

21 Department of Endocrinology, Clinic of Medicine, St. Olavs hospital Trondheim University Hospital, Trondheim, Norway

22 HUNT Research Centre, Department of Public Health and Nursing, NTNU – Norwegian University of Science and Technology, Levanger, Norway

23 Department of Epidemiology Research, Statens Serum Institute, Copenhagen, Denmark

24 Department of Cardiology, Copenhagen University Hospital, Copenhagen, Denmark

25 Department of Human Genetics, University of Michigan, Ann Arbor, MI, USA

26 Clinic of Medicine, St. Olavs hospital Trondheim University Hospital, Trondheim, Norway

\* These authors contributed equally (co-last authors)

†Corresponding authors: [marta.r.moksnes@ntnu.no](mailto:marta.r.moksnes@ntnu.no), [ben.brumpton@ntnu.no](mailto:ben.brumpton@ntnu.no)

## 46 Abstract

47 Iron is essential for many biological processes, but iron levels must be tightly  
48 regulated to avoid harmful effects of both iron deficiency and overload. Here, we  
49 perform genome-wide association studies on four iron related biomarkers (serum iron,  
50 serum ferritin, transferrin saturation, total iron binding capacity) in the Trøndelag  
51 Health Study (HUNT), the Michigan Genomics Initiative (MGI) and the SardiNIA  
52 study, followed by their meta-analysis with publicly available summary statistics,  
53 analyzing up to 257 953 individuals. We identify 127 genetic loci associated with iron  
54 traits. Among 19 novel protein-altering variants, we observe a rare missense variant  
55 (rs367731784) in HUNT, which suggests a role for *DNAJC13* in transferrin recycling.  
56 We further validate the latest genetic risk scores for each biomarker in HUNT (6%  
57 variance in serum iron explained) and present linear and non-linear Mendelian  
58 randomization analyses of the traits on all-cause mortality. We find evidence of a  
59 harmful effect of increased serum iron and transferrin saturation in linear analyses that  
60 estimate population-averaged effects. However, there was weak evidence of a  
61 protective effect of increasing serum iron at the very low end of its distribution. Our  
62 findings contribute to our understanding of the genes affecting iron status and its  
63 consequences on human health.

64

## 65 Introduction

66 Iron is essential for a variety of physiological processes in the human body, but excess iron is  
67 toxic. Iron overload is associated with a wide range of health problems, including liver  
68 damage, type 2 diabetes, cardiovascular disease and neurodegenerative diseases such as  
69 Alzheimer's disease<sup>1-3</sup>, while long-term iron deficiency causes anemia, which can disrupt  
70 cognitive function and the immune system<sup>4-6</sup>. Because of the damaging effects of both  
71 deficiency and overload, iron metabolism is tightly regulated<sup>7</sup>.

72

73 Iron is bound, transported and delivered around the body by the transferrin glycoprotein<sup>8</sup>,  
74 while the main intracellular iron storage, ferritin, provides a long-term reserve of iron for  
75 formation of hemoglobin and other heme proteins<sup>9-11</sup>. Serum iron, serum ferritin, transferrin  
76 saturation percentage (TSP) and the total iron binding capacity (TIBC) of transferrin are  
77 biochemical measurements that are commonly used together to assess an individual's iron  
78 status<sup>12</sup>.

79

80 Mutations in various iron metabolism genes can cause both iron deficiency and overload<sup>13-15</sup>.  
81 Genetic variants in the transferrin gene, *TF*, and in the homeostatic iron regulator gene, *HFE*,  
82 have been estimated to account for about 40% of genetic variation in transferrin levels<sup>16</sup>. A  
83 recent genome-wide association study (GWAS) meta-analysis<sup>17</sup> of serum iron, ferritin, TSP  
84 and TIBC from Iceland, UK and Denmark reported 46 novel loci associated with at least one  
85 of these biomarkers, implicating proteins involved in iron homeostasis. Identifying additional  
86 genetic loci associated with iron status could further increase our understanding of  
87 pathomechanisms underlying dysregulated iron levels. Furthermore, genetic variants from the  
88 most recent study<sup>17</sup> could improve existing genetic risk scores (GRS) that have been widely  
89 used to assess the causal associations of iron status on a range of outcomes using Mendelian  
90 Randomization<sup>18-23</sup> (MR). However, the new GRSs have not yet been validated in an  
91 independent study. Further, despite the observed damaging effects of both very high and very  
92 low iron stores, no previous MR studies have investigated the shape of the associations  
93 between genetically proxied iron status biomarkers and mortality. By validating the most  
94 recent genetic risk scores and using MR in an independent study (HUNT), we provide robust  
95 and novel insights into the causal associations between iron status biomarkers and all-cause  
96 mortality, particularly regarding non-linear relationships.

97

98 To discover novel genetic variants associated with iron status, we combine three  
99 approaches: (i) genome-wide association studies of variants deeply imputed from the  
100 TOPMed reference panel<sup>24</sup> in the Trøndelag Health Study (HUNT)<sup>25</sup> and the Michigan  
101 Genomics Initiative (MGI), as well as variants imputed from a cohort specific  
102 reference panel in SardiNIA<sup>26</sup> (ii) association tests with genotyped coding variants  
103 selected from low-coverage (5x) whole-genome sequencing, (iii) genome-wide meta-  
104 analyses of HUNT, MGI, SardiNIA and summary statistics from deCODE, Interval  
105 and the Danish Blood Donor Study (DBDS)<sup>17</sup>. The analyses included up to 257 953  
106 individuals (57% females, 43% males) with measured iron status biomarkers. We  
107 evaluate the variance explained by previously published variants for serum iron, serum  
108 ferritin, TSP and TIBC in HUNT. Furthermore, we use the genetic variants for the  
109 iron status biomarkers to estimate the average causal effect of a population shift in the  
110 biomarker distributions on all-cause mortality (the population-averaged effect), and  
111 for the first time, investigate the shape of the causal relationships using non-linear  
112 Mendelian Randomization.

113

## 114 Results

### 115 Discovery of genetic loci associated with iron status

116 We identified 127 genetic loci (82 novel for at least one trait) associated ( $p$ -value  $< 5 \times 10^{-8}$ )  
117 with the four iron traits, serum iron, serum ferritin, TIBC and TSP, (Supplemental Table 1,  
118 Supplemental Figures 1-4) in genome-wide association meta-analyses of the iron status  
119 biomarkers in 6 cohorts: HUNT, MGI, SardiNIA, deCODE, Interval and DBDS  
120 (Supplemental Table 2). Among the 77 unique index variants (the variants with the lowest  $p$ -  
121 value) in novel loci that had been imputed in more than one study, 60 had consistent  
122 directions of effects across all the analyzed studies. We also identified three novel missense  
123 variants associated with at least one iron trait among the variants selected for targeted  
124 genotyping in HUNT (Supplemental Table 3).

125

126 Genes in several associated loci coded for proteins with established functions in iron  
127 homeostasis (*TF* [transferrin]) *SLC25A37* [mitoferrin-1], *SLC25A28* [mitoferrin-2], *SLC11A2*  
128 [divalent metal-transporter 1] and *SLC40A1* [ferroportin-1], *HFE* [homeostatic iron  
129 regulator], *TFRC* [transferrin receptor], *TFR2* [transferrin receptor 2], *HAMP* [hepcidin],  
130 *ERFE* [erythroferrone], *HMOX1* [heme oxygenase], *IREB2* [iron responsive element binding

131 protein 2], *EPAS1* [endothelial PAS Domain Protein 1] and *TMPRSS6* [transmembrane serine  
132 protease 6])<sup>7,27–29</sup> Four of these loci (*SLC25A28*, *HMOX1*, *IREB2*, *EPAS1*) had not been  
133 reported for iron status biomarkers in GWAS studies before, providing additional confidence  
134 in the GWAS we report. With two exceptions (*HAMP*, *TFR2*), these genes were the nearest  
135 gene to the index variant in the locus.

136

### 137 Protein-altering variants in meta-analysis loci

138

139 We identified 32 protein-altering single nucleotide polymorphisms (SNPs) in the meta-  
140 analysis, which were either index variants or variants in strong linkage disequilibrium (LD)  
141 ( $R^2 > 0.8$  or  $D' = 1.0$ ) with an index variant (Supplemental Table 1). In addition to SNPs known  
142 to be related to diseases such as hemochromatosis, atransferrinemia and iron deficiency  
143 anemia<sup>15,30–34</sup>, and variants that had previously been reported for at least one of the iron  
144 traits<sup>17,35</sup>, we identified 11 protein-altering variants in novel iron status loci (Supplemental  
145 Table 4): rs9427398 (*FCGR2A*), rs2437150 (*SPRTN*), rs1047891 (*CPS1*), rs41274050  
146 (*AICF*), rs1935 (*JMJD1C*), rs3742049 (*COQ5*), rs4149056 (*SLCO1B1*), rs2070863  
147 (*SERPINF2*), rs883541 (*WIP1I*), rs1800961 (*HNF4A*) and rs738409 (*PNPLA3*). In known  
148 iron status loci, we further identified eight protein-altering variants not previously reported  
149 for any iron traits: rs367731784 (*DNAJC13*), rs3812594 (*SEC16A*), rs34376913 (*C9orf163*),  
150 rs445520 (*SLC11A2*), rs28929474 (*SERPINA1*), rs737700 (*C16orf71*), rs77542162 (*ABCA6*)  
151 and rs34654230 (*RCN3*).

152

### 153 Custom genotyped variants in HUNT: Protein-altering variants in iron status 154 loci

155 Among the targeted candidate variants in HUNT identified by sequencing and clinical  
156 studies, we identified three additional, novel protein-altering variants (Supplemental Table 3)  
157 that were not included in the meta-analyses, and which were associated with iron status  
158 biomarkers. These were located in *NRM* (rs374815811), *HLA-DRB5* (rs701884) and *TFR2*  
159 (chr7:100629337:A:T, GRCh38).

160

### 161 Heritability and genetic correlation of iron status markers

162 We estimated the respective narrow-sense SNP heritability (variance explained,  $V_g/V_p \pm$   
163 1SE) of serum iron ( $0.15 \pm 0.01$ ), TIBC ( $0.43 \pm 0.01$ ) and TSP ( $0.21 \pm 0.01$ ) in HUNT using  
164 genome-wide complex trait analysis (GCTA)<sup>36</sup>. We found pair-wise genetic correlations

165 between 11% and 75% (Supplemental Table 5) for the four iron status biomarkers using LD  
166 Score Regression (LDSC)<sup>37</sup> with the meta-analysis summary statistics. The TSP phenotype  
167 was derived from the serum iron and TIBC measurements, giving rise to the two strongest  
168 genetic correlations. The weakest correlation (iron vs TIBC) did not reach nominal  
169 significance (p-value=0.35).

170

## 171 **Functional mapping**

172 We used Bayesian colocalization analysis to identify 94 unique pairs of GWAS loci and cis-  
173 expression quantitative trait locus (cis-eQTL) signals that showed sufficient overlap in at  
174 least one tissue to be consistent with a shared causal variant for the gene expression and the  
175 iron status biomarker (Supplemental Table 6). We found associations in a range of tissues  
176 which highlighted genes with established roles in iron metabolism (*TF* [posterior probability  
177 of a common causal variant, PP4=0.96], *TMPRSS6* [PP4=0.82], *ERFE* [PP4=0.97-0.98],  
178 *IREB2* [PP4=0.80], *SLC40A1* [PP4=0.79-0.96])<sup>13,27</sup>. Additionally, our results confirmed  
179 previously reported genes (*DUOX2* [PP4=0.76], *HBSIL* [PP4=0.98], *IL6R* [PP4=0.81-0.82],  
180 *SLC25A37* [PP4=0.85], *ABO* [PP4=0.97], *RNF43* [PP4=0.99])<sup>17,35</sup>, and identified novel genes  
181 interacting with previously reported genes, for example *DUOXA2*<sup>38</sup>. Several iron status loci  
182 were also colocalized with cis-eQTL signals for genes in the major histocompatibility  
183 complex (MHC) other than *HFE*<sup>39</sup>, as well as with transcription regulators<sup>40-42</sup>, additional  
184 transporter proteins<sup>43,44</sup> and transferases<sup>45,46</sup>.

185

186 Using Data-driven Expression Prioritized Integration for Complex Traits (DEPICT)<sup>47</sup> we  
187 found an enriched (false discovery rate [FDR] <0.05) expression of ferritin associated genes  
188 in the urogenital system, digestive system, and the hemic and immune system (Supplemental  
189 Table 7). Serum iron, TSP and TIBC associated genes were not enriched in any tissue types  
190 at FDR<0.05, however the strongest enrichment for genes in all three traits were found in  
191 liver tissue, and particularly in hepatocytes (TSP, TIBC). The top ten genes per trait when  
192 prioritized based on similarity between the associated (p-value < 5×10<sup>-8</sup>) loci, included  
193 known iron regulatory genes (*TFR2*, *HAMP*, *TFRC*, *SLC40A1*), genes in which we had  
194 identified protein-altering variants (*IL6R*, *F5*, *GCKR*, *DUOX2*, *SERPINA1*, *ABCA6*,  
195 *SLCO1B1*), genes we found in the colocalization analysis (*DUOXA2*, *IL1RN*, *SLC25A37*), as  
196 well as genes predicted to have iron ion binding and heme binding properties in gene  
197 ontology analyses (*CYP3A43*, *CYP3A5*)<sup>48</sup> (Supplemental Table 8). Finally, we used DEPICT

198 and found gene sets enriched with iron status associated genes (Supplemental Table 9). Most  
199 of the top ten gene sets at  $FDR < 0.05$  were from iron and TSP associated loci: Several were  
200 related to the liver (including abnormal liver physiology and gene sets related to metabolic  
201 processes), but also to inflammation (acute-phase response, decreased leukocyte cell  
202 number), coagulation (coagulation factor protein-protein interaction networks) and  
203 neurodevelopment (abnormal myelination). Most of the top ten gene sets enriched with  
204 ferritin and TIBC associated loci did not reach  $FDR < 0.05$ , but included decreased circulating  
205 iron levels, decreased spleen iron level, gene sets related to red blood cells (decreased  
206 hemoglobin, decreased hematocrit, erythrocyte homeostasis and differentiation), as well as  
207 liver fibrosis and liver inflammation.

208

209 We identified the 1% top ranked genes per trait based on both physical distance to the  
210 associated genetic variants and functional similarity to other associated genes (Supplemental  
211 Tables 10-13) using Polygenic Priority Scores (PoPS)<sup>49</sup>. The prioritized genes included the  
212 main known iron regulatory genes, several genes that were nearest to the meta-analysis index  
213 variants and novel genes in which we identified protein-altering variants (*WIP11*, *SERPINF2*,  
214 *HNF4A*), further supporting a role for these genes in iron biology.

215

## 216 Phenome-wide association study (PheWAS) of biomarker loci

217 In total, 69 of the meta-analysis index variants were significantly associated ( $p$ -value  $<$   
218  $2.4 \times 10^{-7}$ ) with at least one additional phenotype ('phecode'<sup>50</sup>), blood biomarker or continuous  
219 trait in UK Biobank, and 97 phenotypes were significantly associated with at least one variant  
220 (Supplemental Table 14). The associations spanned numerous biological domains, but most  
221 associations were within the endocrine/metabolic (288 variant-trait associations), digestive  
222 (139 variant-trait associations) and genitourinary (46 variant-trait associations) domains. The  
223 strongest associations ( $p$ -values  $< 1 \times 10^{-300}$ ) were within the hematopoietic, digestive and  
224 endocrine/metabolic domains: The *HFE* variants rs1800562, rs144861591 and rs79220007  
225 were associated with disorders of mineral metabolism, and in particular with disorders of iron  
226 metabolism, the *SLCO1B1* variant rs2900478 was associated with bilirubin, the  
227 *ASGR2;ASGR1* variant rs186021206 was associated with alkaline phosphatase, and the  
228 *GCKR* variants rs1260326 and rs11336847 were associated with triglycerides. Overall, all the  
229 GRSs for the four iron status biomarkers were associated with disorders of mineral  
230 metabolism, in particular iron metabolism (Figure 1, Supplemental Table 15). Several GRSs

231 were associated with anemias (iron, ferritin, TSP) and with coagulation defects (ferritin,  
 232 TSP). Finally, the GRS for TIBC was also associated with liver cirrhosis without mention of  
 233 alcohol, and the GRS for ferritin was associated with chronic non-alcoholic liver disease, and  
 234 with phlebitis and thrombophlebitis.  
 235

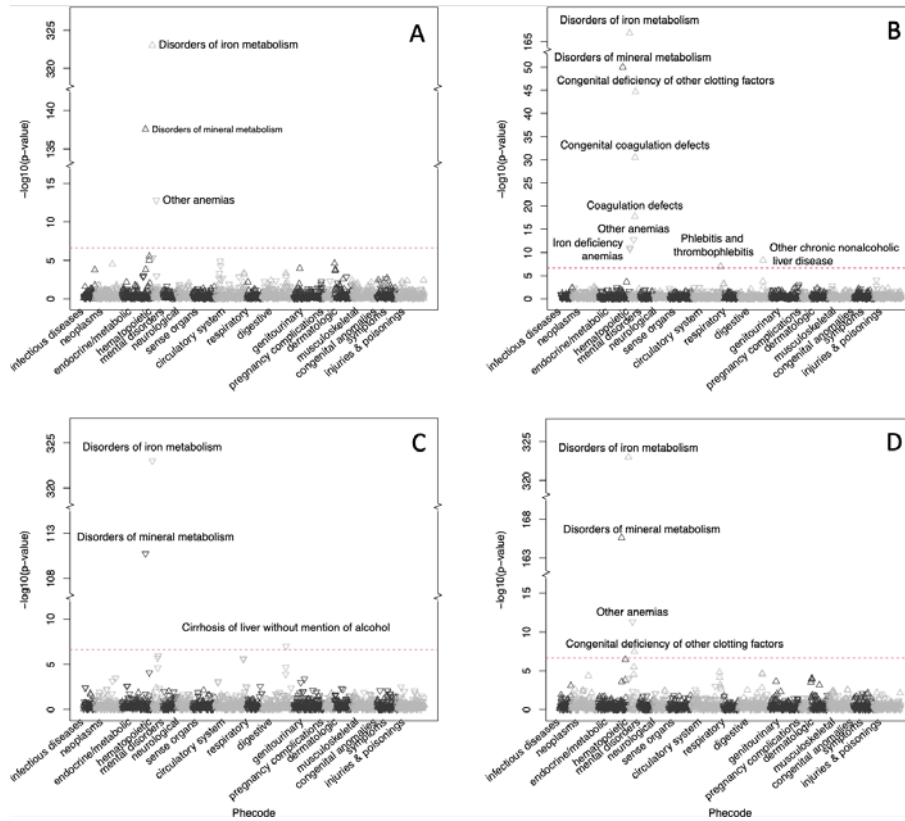

236  
 237 *Figure 1: GRS-PheWAS: Phenome-wide associations between the GRS for each biomarker (serum iron [A], serum ferritin*  
 238 *[B], total iron binding capacity [C] and transferrin saturation percentage [D]) and 1 688 phecodes, blood biomarkers and*  
 239 *continuous traits in the UK Biobank. Triangles pointing upwards indicate a positive association between the phenotype and*  
 240 *the GRS (where a higher GRS score represents higher level of the iron status biomarker) and vice versa. Associations with*  
 241 *p-values <  $10^{-322}$  are plotted at  $10^{-322}$ . The Bonferroni corrected p-value cut-off ( $2.4 \times 10^{-7}$ ) is given as a red dotted line.*

242

## 243 Linear Mendelian Randomization

244 The linear MR (ratio of coefficients method) indicated an increased mortality risk with  
 245 increased serum iron and TSP, with the point estimates suggesting that an increase of 1  
 246 standard deviation (SD) in both serum iron (1 SD =  $6.3 \mu\text{mol/L}$ ) and TSP (1 SD = 11.3  
 247 percentage points) would lead to an increased risk of mortality of 7% (Table 1). The  
 248 estimates for ferritin and TIBC were not statistically significant, however the point estimates  
 249 for a 1 standard deviation increase in serum ferritin (1 SD =  $46 \mu\text{g/L}$ ) and TIBC (1 SD = 9.2



250  $\mu\text{mol/L}$ ) were a 4% increase and 3% decrease in mortality, respectively (Table 1). The  
251 estimate for ferritin was also very imprecise.

252

253 *Table 1: Linear Mendelian randomization ratio of coefficient estimates: Hazard ratios with 95% confidence intervals for all-*  
254 *cause mortality are given per 1 standard deviation increase in the biomarker. The sample size is given as N.*

| <b>Biomarker</b> | <b>N</b> | <b>Hazard ratio (95% CI)</b> | <b>P-value</b> |
|------------------|----------|------------------------------|----------------|
| Serum iron       | 56 654   | 1.07 (1.01 to 1.14)          | 0.03           |
| Serum ferritin*  | 2 335    | 1.04 (0.26 to 4.22)          | 0.95           |
| TSP              | 56 651   | 1.07 (1.02 to 1.12)          | 0.01           |
| TIBC             | 56 654   | 0.97 (0.93 to 1.01)          | 0.13           |

255 Confidence interval (CI), Transferrin saturation percentage (TSP), Total iron binding capacity (TIBC)

256 \*Non-pregnant women, 20-55 years old

257

## 258 Non-linear Mendelian Randomization

259 To investigate a potential non-linear causal association between iron status and all-cause  
260 mortality, we used the GRSs as instruments for serum iron (F-statistic=3618,  $R^2=0.06$ ), TIBC  
261 (F-statistic=8373,  $R^2=0.129$ ), TSP (F-statistic=6811,  $R^2=0.107$ ) and ferritin (F-  
262 statistic=37.81,  $R^2=0.015$ ) in a non-linear Mendelian randomization analysis and estimated  
263 the shape of the associations between the genetically predicted traits and all-cause mortality  
264 (Figure 2). The median follow-up time was 23.6 years. After performing a statistical test for  
265 whether the best-fitting non-linear model of degree 1 fitted the data better than a linear model  
266 (p-values: 0.60, 0.05, 0.23 and 1 for iron, ferritin, TIBC and TSP respectively), generally, we  
267 did not find strong statistical evidence supporting a non-linear relationship over a linear one  
268 for the associations between any of the genetically proxied iron traits and all-cause mortality.  
269 However, the point estimates for serum iron do follow a J-shape, with a negative slope at  
270 very low levels of serum iron and a constant positive slope above  $10 \mu\text{mol/L}$ . The point  
271 estimates were however imprecise at the tails of the distribution. The other analyses indicate  
272 a lower risk at higher TIBC and lower TSP and ferritin levels, with a weak indication (p-  
273 value=0.05) of a non-linear effect for ferritin. Post-hoc sensitivity analyses using genetic  
274 instruments that were consistent with systemic iron status (increased iron, ferritin, and TSP,  
275 and decreased TIBC) rather than just representing a single biomarker, gave similar results  
276 (Supplemental Figure 5).

277

It is made available under a [CC-BY 4.0 International license](https://creativecommons.org/licenses/by/4.0/) .

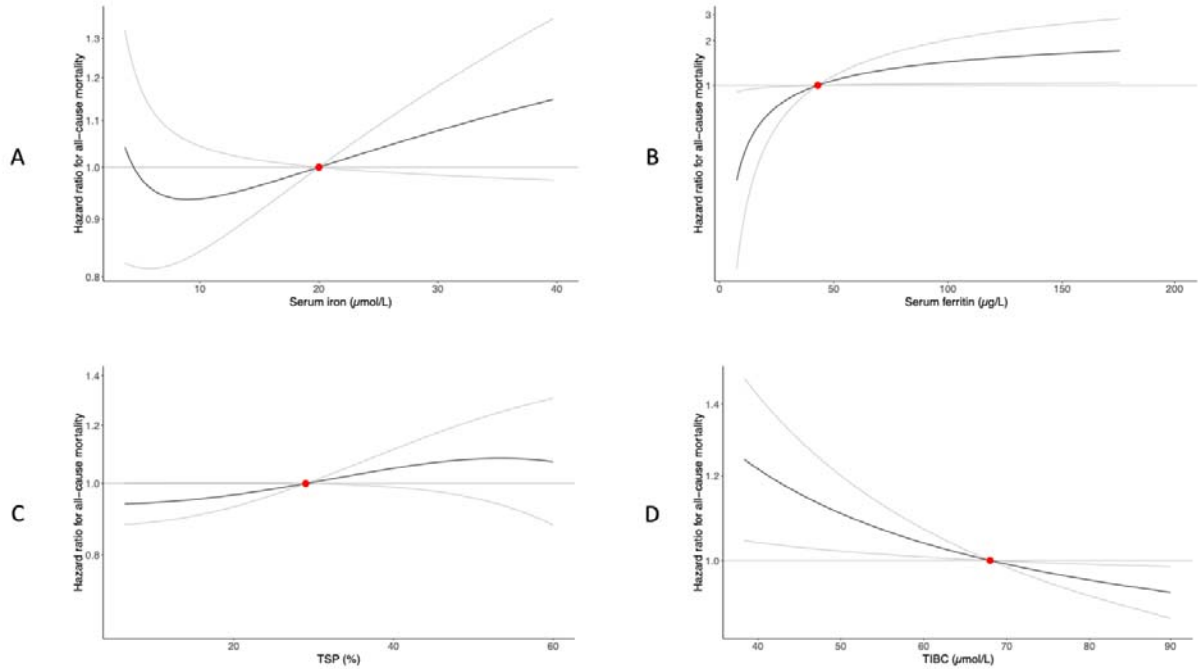

278

279

280

281

282

283

284

Figure 2: Non- linear Mendelian randomization: Dose-response curves (black) between iron traits and all-cause mortality in HUNT (gray lines give 95% confidence interval). The x-axis gives A: serum iron levels ( $\mu\text{mol/L}$ ), B: serum ferritin ( $\mu\text{g/L}$ ), C: transferrin saturation (%) and D: total iron binding capacity (TIBC) ( $\mu\text{mol/L}$ ). The y-axis gives the hazard ratios for all-cause mortality with respect to the reference values (red dot), which represent the established target values (iron, TIBC, TSP)<sup>51</sup> or median value (ferritin) for the traits. The curve gradients represent the localized average causal effect at each point.

## 285 Discussion

286 We performed the largest GWAS meta-analysis to-date of iron status biomarkers and  
287 identified 127 genetic loci (82 novel) associated with iron status, including 19 novel protein-  
288 altering variants. Although 82 loci were classified as novel for at least one of the tested iron  
289 traits, some had known associations with other tested traits or with related traits such as  
290 hemoglobin levels and red blood cell count and volume<sup>52</sup>. Because iron traits are biologically  
291 linked, we might expect to find the same loci associated with several of the tested traits, as  
292 seen for loci with established roles in iron metabolism (e.g. *HFE*, *TF* and *TMPRSS6*) and  
293 others. We confirmed the genetic similarity between iron status biomarkers by observing a  
294 genetic correlation of 75% between serum iron and TSP. However, most of the loci were  
295 specifically associated with a single trait, which was in line with the low genetic correlation  
296 between other pairs of biomarkers.

297

298 Overall, our findings are consistent with established knowledge about iron homeostasis and  
299 the role of iron in various biological processes: The PheWAS analyses linked the meta-  
300 analysis loci to many different traits and phenotypes, particularly within the hematopoietic,  
301 digestive, endocrine/metabolic and genitourinary domains. Further, in four novel loci, the  
302 genes nearest to the index variant encoded proteins with established roles in iron regulation:  
303 1) the mitochondrial iron transporter mitoferrin-2 (*SLC25A28*), 2) heme oxygenase 1  
304 (*HMOX1*), which catalyzes heme degradation, 3) the iron-responsive element binding 2  
305 (*IREB2*), and 4) *PAS1*, which regulates erythropoiesis according to cellular iron availability<sup>28</sup>.  
306 Further, the novel protein-altering variants were found in genes associated with various  
307 biological traits and functions, which potentially highlight the many biological processes both  
308 involved in and dependent on iron and iron regulation. These included, but were not limited  
309 to, genes involved in or associated with: 1) Iron gut absorption, regulation and transport  
310 (*TFR2*, *SLC11A2*, *DNAJC13*)<sup>8,54,53</sup>, where we found a rare (minor allele frequency  
311 (MAF)=0.0009) protein-altering variant with moderate effect size in *DNAJC13*, a gene  
312 suggested to be involved in transferrin recycling<sup>53</sup>. This variant was only imputed in HUNT,  
313 where it was more than 100 times more common than in other non-Finnish Europeans  
314 (<https://gnomad.broadinstitute.org/variant/rs367731784>)<sup>55</sup>; 2) Concentrations of hemoglobin  
315 (*SPRTN*, *FCGR2A*, *CPS1*, *PNPLA3*, *ABCA6*)<sup>49,56-58</sup>, which holds more than two thirds of the  
316 body's iron<sup>1</sup>, and bilirubin (*SLCO1B1*)<sup>59</sup>, which together with iron are products of heme  
317 degradation; 3) Liver-related traits (*ABCA6*, *HNF4A*, *PNPLA3*)<sup>60,61</sup>; 4) Iron-dependent

318 (putative) tumor suppression (*JMJD1C*)<sup>62</sup>; 5) Iron accumulation in the brain (*WIP1*,  
319 associated via its homolog *WIPI4*<sup>63</sup>) and 6) Coagulation and immune response (*SERPINA1*,  
320 *SERPINF2*)<sup>64</sup>. A previous study also identified a different protein-altering SNP in the serine  
321 protease inhibitor *SERPINA1*<sup>17</sup>. The transmembrane serine protease 6 (encoded by  
322 *TMPRSS6*) is a negative regulator of hepcidin<sup>65</sup>, a key hormone regulator of iron  
323 homeostasis<sup>13</sup>. Given the role of the transmembrane serine protease 6 in iron regulation, both  
324 the serine protease inhibitors could potentially affect iron regulation via this gene.

325

326 Using DEPICT, we detected an enriched expression of genes in iron status loci in the liver.  
327 This is in line with the important role of the liver in iron metabolism and storage<sup>66</sup>, including  
328 hepcidin production. Consistent with previous studies, our analysis prioritized genes  
329 encoding known hepcidin regulators such as *HFE*, *TMPRSS6*, *TF*, *TFRC*, *TFR2*, *ERFE* and  
330 *IL6R*<sup>67-70</sup>. Mutations in several of these genes have been demonstrated to cause diseases of  
331 iron deficiency or overload<sup>1,15,33,71</sup>. The associations with other genes related to inflammation,  
332 both in the DEPICT and colocalization analyses, could possibly be related to the hepcidin  
333 response to inflammation. The genes and gene sets prioritized by DEPICT pointed to several  
334 different biological processes, which might reflect the numerous roles of iron in the body. A  
335 limitation with using a similarity-based method for gene set and gene prioritization for iron  
336 traits was that the software excluded the MHC region from the analysis, thereby also  
337 excluding one of the most central genes in iron homeostasis, the *HFE* gene.

338

339 Colocalization analysis further linked the GWAS loci both to the liver and to iron overload:  
340 iron status loci overlapped with cis-eQTLs for several of the hepcidin regulators, and genes  
341 involved in other liver functions such as lipid and fatty acid metabolism (*ORMDL1*,  
342 *FADS1*)<sup>72,73</sup>. The latter was also found in previous studies<sup>35</sup> and is in line with the results  
343 from the PheWAS analysis. The colocalization of iron status loci and cis-eQTLs were  
344 however found in several tissues, and not primarily in liver. A limitation to the analysis was  
345 however that there were different sample sizes for each tissue, where liver had a relatively  
346 small sample size and subsequently lower power than other tissues.

347

348 Because iron plays an essential role in so many biological processes, several Mendelian  
349 randomization studies have explored the causal effect of iron status on a range of diseases<sup>18-</sup>  
350 <sup>23</sup>. Despite the known harmful effects of both iron deficiency and overload, no previous MR  
351 studies have investigated the shape of the exposure-outcome relationship. We therefore

352 assessed the causal effect of iron status biomarkers on all-cause mortality and investigated the  
353 shape of these associations. We demonstrated that the GRSs based on the previous study  
354 were good instruments for iron, TSP and TIBC in the independent HUNT study (variance  
355 explained 6% (iron), 11% (TSP), 13% (TIBC), 1.6% (ferritin)). Using these, we found  
356 evidence of a harmful effect of increased serum iron and TSP (derived from serum iron and  
357 TIBC) in linear analyses that estimated population-averaged effects. The point estimates of  
358 TIBC and ferritin were also suggestive of a harmful effect of increased iron status, although  
359 the estimates were not statistically significant, and the ferritin estimate was very imprecise  
360 due to the small sample size. In non-linear models, we did not find strong statistical evidence  
361 supporting non-linear relationships over linear ones. However, there was weak evidence of a  
362 protective effect of increasing serum iron at the very low end of its distribution, at serum iron  
363 levels below the normal range of 10-34  $\mu\text{mol/L}$ <sup>51</sup>. The results were supported by post-hoc  
364 sensitivity analyses using only genetic variants consistent with systemic iron status.

365

366 The study had several clear limitations. First, in our GWAS analyses we did not adjust for  
367 additional factors that could affect the biomarker concentrations, such as iron  
368 supplementation, inflammatory status, alcohol consumption and menopausal status (except  
369 for ferritin, where the full sample was pre-menopausal). These factors could therefore have  
370 influenced the effect estimates, particularly for rare variants. Second, we would need a larger  
371 sample size to confirm a non-linear shape of the exposure-outcome relationship at the  
372 extremes of the biomarker distributions. The analysis of ferritin was particularly limited by  
373 the small sample (N=2334) consisting of only relatively young, non-pregnant females, giving  
374 a low number of strata and few deaths. Third, the association of the GRSs with all-cause  
375 mortality could be attenuated because HUNT participants with suspected iron deficiency  
376 anemia or phenotypic hemochromatosis were later contacted by the primary health care  
377 services and offered treatment, and they could therefore have obtained a healthier iron status  
378 than they would otherwise have had, causing the analysis to be less precise. Finally, although  
379 the four biomarkers are commonly used to assess people's iron status, neither of them is a  
380 very good individual predictor of iron stores, and the findings should therefore be interpreted  
381 with caution.

382

383 In summary, we have increased the number of iron status associated loci through a  
384 large GWAS meta-analysis and validated the latest genetic risk scores for four iron  
385 status biomarkers. We find evidence of a harmful population-averaged effect of

386 genetically proxied serum iron and TSP, and weak evidence of a protective effect of  
387 increasing serum iron in individuals at the very low end of its distribution. Our  
388 findings contribute to our understanding of the genes affecting iron status and its  
389 consequences on human health.

390

## 391 **Methods**

### 392 **Cohort descriptions**

393 Distributions of the age and sex of the HUNT, MGI and SardiNIA participants included in  
394 the current study are reported in Supplemental Table 2.

395

#### 396 **HUNT**

397 The HUNT Study is a longitudinal population-based health study conducted in the county of  
398 Trøndelag, Norway since 1984<sup>25</sup>. About 123 000 individuals (aged  $\geq 20$  years) have  
399 participated in at least one of four surveys, and more than 70 000 of these participants have  
400 been genotyped using one of three Illumina HumanCoreExome arrays: 12 v.1.0, 12 v.1.1 and  
401 24 with custom content (UM HUNT Biobank v1.0). Sample and variant quality control (QC)  
402 was performed using standard practices and has been reported in detail elsewhere<sup>74</sup>. All  
403 variants were imputed from the TOPMed reference panel (freeze 5)<sup>24</sup> using Minimac4 v1.0  
404 (<https://genome.sph.umich.edu/wiki/Minimac4>). The reference panel is composed of 53 831  
405 multi-ethnic samples and 410 323 831 SNP and indel variants at high depth (mean read depth  
406 38.2X). Variants with a minor allele count (MAC)  $> 10$  or imputation  $R^2 \geq 0.3$  were included  
407 in analysis. A subset of individuals was genotyped with additional custom content variants.

408

#### 409 **MGI**

410 The Michigan Genomics Initiative (MGI) is a repository of genetic data and electronic  
411 medical records from Michigan Medicine. Approximately 80 000 participants (aged  
412  $\geq 18$  years) have predominantly been enrolled prior to surgical procedures with over 59 000  
413 individuals genotyped using Illumina Infinium CoreExome-24. Following genotyping,  
414 sample-level QC was performed to remove sex-mismatches, duplicates, samples with call  
415 rate  $< 99\%$ , or with estimated contamination  $> 2.5\%$ . Variants with GenTrain score  $< 0.15$ ,  
416 Cluster Separation scores  $< 0.3$ , Hardy-Weinberg Equilibrium p-value among unrelated  
417 European individuals  $< 1 \times 10^{-4}$ , or with evidence of batch effects (p-value  $< 1 \times 10^{-3}$ , Fisher's  
418 exact test) were excluded. Imputation was performed using the TOPMed Imputation Server

419 (v1.2.7). Variants with MAF > 0.05% and imputation quality  $R^2 \geq 0.3$  were included in  
420 analysis.

421

## 422 SardiNIA

423 The SardiNIA study is a longitudinal population-based health study including 6 602  
424 individuals from the Lanusei valley on Sardinia. The participants have been genotyped on  
425 four different Illumina Infinium arrays, OmniExpress, Cardio-MetaboChip<sup>75</sup>, ImmunoChip<sup>76</sup>  
426 and Exome Chip), and then imputed from a SardiNIA specific sequencing panel (~4x  
427 coverage) of 3 839 individuals, using Minimac3<sup>77</sup>. Markers with imputation quality  $R^2 > 0.3$   
428 (or > 0.6 in variants with MAF < 1%) were retained, resulting in a total of ~19 million  
429 genetic variants. Samples, genotyping, sequencing and variant calling have previously been  
430 described elsewhere<sup>78</sup>.

431

## 432 Iron Status Biomarkers

433 Distributions of the biomarker levels in the HUNT, MGI and SardiNIA participants included  
434 in the current study are reported in Supplemental Table 2.

435

## 436 HUNT

437 Non-fasting serum samples were drawn in 1995-1997 (HUNT2). Serum iron concentration  
438 ( $\mu\text{mol/L}$ ) was determined using a FerroZine method using a Hitachi 911 Autoanalyzer  
439 (reagents from Boehringer, Germany). The serum transferrin concentration ( $\mu\text{mol/L}$ ) was  
440 analyzed by an immunoturbidimetric method using the Hitachi 911 Autoanalyzer (reagents  
441 from DAKO A/S, Denmark), and calculated for a molecular weight of 79 570 Da. TIBC was  
442 calculated as 2 x the serum transferrin concentration. The TSP was calculated as 100 x [serum  
443 iron concentration/TIBC]. Serum ferritin was measured from serum samples using an Abbott  
444 AxSYM analyzer (reagents from Abbott Laboratories, USA). In total, 56 667 HUNT  
445 participants had measurements of serum iron and TIBC, 56 664 had measurements of TSP,  
446 while ferritin was only measured in 2 334 women (fertile, non-pregnant, aged 20-55 years).

447

## 448 SardiNIA

449 Serum iron ( $\mu\text{mol/L}$ ) and serum transferrin concentrations ( $\mu\text{mol/L}$ ) were measured in fasting  
450 blood-samples from individuals with genotype and imputation data from the SardiNIA  
451 cohort. TIBC was calculated as 2 x the serum transferrin concentration. In total, 5 930 and

452 5 926 genotyped SardiNIA participants had measurements on serum iron and TIBC  
453 respectively.

454

#### 455 MGI

456 Serum iron concentration was measured using the Ferrozine Colorimetric assay, and serum  
457 ferritin was measured using a Chemiluminescent Immunoassay. Serum transferrin  
458 concentrations were measured using an Immunoturbidimetric assay, and TIBC was calculated  
459 as 2 x the serum transferrin concentration. The TSP was calculated as 100 x [serum iron  
460 concentration/TIBC]. For individuals with multiple measurements, the initial measurement  
461 was used in the analyses. In total, 10 403, 9 480, 10 399 and 10 381 participants from MGI  
462 had measurements of serum iron, serum ferritin, TIBC and TSP respectively.

463

#### 464 Association analyses

465 Association analyses of all iron traits (iron, ferritin, TIBC, TSP) in HUNT were performed  
466 using a linear mixed model regression under an additive genetic model for each variant as  
467 implemented in BOLT-LMM v2.3.4<sup>79</sup>, which also controls for relatedness between the  
468 samples. Association analyses of all iron traits in MGI were performed using a linear  
469 regression model in unrelated individuals using rvtests<sup>80</sup>. In both HUNT and MGI, we  
470 applied rank-based inverse normal transformation on the iron variables after adjusting for age  
471 and sex using linear regression, and included age, sex, genotyping batch and the first 10  
472 principal components (PCs) of ancestry as covariates. Association analyses of serum iron and  
473 TIBC in SardiNIA was performed using age, age<sup>2</sup> and sex-adjusted inverse-normalized  
474 residuals of TIBC or iron as input to the Efficient Mixed Model Association eXpedited  
475 (EMMAX)<sup>81</sup> single variant test as implemented in EPACTS  
476 (<https://github.com/statgen/EPACTS>).

477

478 Additionally, we performed association analyses of serum iron, TIBC and TSP in HUNT with  
479 361 965 additional custom content variants genotyped in 44 248 (serum iron, TIBC) or 44  
480 246 individuals (TSP) using BOLT-LMM v2.3.4<sup>79</sup>, including the same covariates and rank-  
481 based normal transformation of the variables as was done in the main analyses.

482



## 483 Meta-analyses

484 We performed fixed-effect inverse-variance weighted meta-analysis of summary statistics for  
485 iron (sample size N=236 612), ferritin (N=257 953), TIBC (N=208 422) and TSP (N=198  
486 516) using METAL<sup>82</sup>. Serum iron and TIBC were meta-analyzed in all studies (HUNT, MGI,  
487 SardiNIA and summary statistics from deCODE and Interval). SardiNIA did not have data on  
488 serum ferritin and TSP and was therefore excluded from these meta-analyses, while the  
489 available summary statistics for ferritin also included the DBDS study. To harmonize  
490 genomic positions from each study, we used LiftOver from UCSC<sup>83</sup> to map the data from  
491 SardiNIA from Human Genome Build GRCh37 to GRCh38. Because standard errors were  
492 not given in the available summary statistics from deCODE, Interval and DBDS, we  
493 calculated them as the absolute value of the (effect size/qnorm(p-value/2)), where qnorm  
494 represents the inverse standard normal distribution. In HUNT, MGI and SardiNIA we  
495 performed genomic control correction of any analyses with an inflation factor  $\lambda > 1$  prior to  
496 meta-analysis. We considered genetic loci reaching a p-value  $< 5 \times 10^{-8}$  for follow-up analyses.  
497

## 498 Definition of independent loci and locus novelty

499 Genetic loci were defined around variants with a genome-wide significant association with a  
500 trait (p-value  $< 5 \times 10^{-8}$ ). The locus borders were set 500 kb to each side of the highest and  
501 lowest genetic positions reaching genome-wide significance in each region. Overlapping  
502 genetic loci were merged if the index (lowest p-value) variants were in LD ( $R^2 \geq 0.2$  and/or  
503  $D' \geq 0.8$ ), or if one of the index variants was too rare to calculate LD with the other from our  
504 reference panel of 5000 unrelated individuals in HUNT. A locus was classified as novel for a  
505 given trait if it had not been reported previously for the trait. Previously published variants  
506 were identified through a literature search and a look-up in the GWAS catalog<sup>84</sup>.  
507

## 508 Annotation of genetic variants

509 We used plink v1.9<sup>85</sup> with a reference panel of 5000 unrelated individuals in HUNT to  
510 identify genetic variants in strong LD ( $R^2 \geq 0.8$ ) with the index variants, and annotated the  
511 functional consequences and rsIDs of the index variants and LD proxies using ANNOVAR  
512 (v.2019Oct24)<sup>86</sup> and the UCSC human genome browser<sup>83</sup>.  
513

## 514 Functional mapping of genetic variants

515 We used three different bioinformatic approaches to perform functional mapping and gene  
516 prioritization of the meta-analysis summary level data: Bayesian colocalization analysis<sup>87,88</sup>,  
517 DEPICT<sup>47</sup> and Polygenic Priority Scores<sup>89</sup>.

518

519 To assess if any iron status loci were overlapping with significant cis-eQTL signals  
520 and consistent with shared causal variants for iron status markers and gene expression  
521 levels in specific tissue types, we used Bayesian colocalization analysis ('coloc') as  
522 implemented in the R package coloc. We used cis-eQTL data from 27 general tissue  
523 types (49 subtypes) in the individuals of European ancestry from the Genotype-Tissue  
524 Expression (GTEx) portal, data set v8 (<https://www.gtexportal.org>) and the GWAS  
525 meta-analysis results for each iron trait as input. For each tissue type, we analyzed all  
526 genes whose expression were associated (p-value <  $5 \times 10^{-8}$ ) with at least one iron  
527 status associated variant (p-value <  $5 \times 10^{-8}$ ), using effect sizes and standard errors for  
528 each variant-trait association as input. The coloc software estimated the variance in  
529 each trait (iron trait or gene expression level) from the sample sizes and minor allele  
530 frequencies. We set the prior probability of a genetic variant being associated with  
531 only iron traits, only gene expression or both traits to be  $10^{-4}$ ,  $10^{-4}$  and  $10^{-6}$   
532 respectively. We considered posterior probabilities (PP4) above 75% to give support  
533 for a common causal variant for the iron trait and expression of the gene in the given  
534 tissue.

535

536 We performed gene set enrichment, gene prioritization and tissue/cell type enrichment tests  
537 on the iron trait loci (p-value <  $5 \times 10^{-8}$ ) using Data-driven Expression Prioritized Integration  
538 for Complex Traits (DEPICT) (v1.1, release 194)<sup>47</sup>. Prior to the analysis we used LiftOver  
539 from the UCSC<sup>83</sup> to convert the genomic positions of the genetic variants from GRCh38 to  
540 GRCh37. Enrichment results with an FDR < 5% were considered significant.

541

542 Finally, we prioritized genes by computing Polygenic Priority Scores<sup>89</sup> from summary-level  
543 data from each iron status biomarker. The method uses Multi-marker Analysis of GenoMic  
544 Annotation (MAGMA)<sup>90</sup> to compute gene-level associations and gene-gene correlations from  
545 the meta-analysis p-values and sample sizes and LD information from individuals of  
546 European ancestry from the 1000 Genomes reference panel<sup>91</sup>. MAGMA is applied a second

547 time to perform enrichment analysis for genetic features. Genes are finally prioritized based  
548 on a combination of physical distance to associated genetic variants and functional similarity  
549 with other associated genes. We considered the 1% top ranked genes per biomarker to be  
550 prioritized genes for the respective traits.

551

### 552 [Heritability estimation](#)

553 We estimated the narrow-sense additive SNP heritability of serum iron, TIBC and TSP in  
554 HUNT using GCTA<sup>36</sup>. Ferritin heritability was not estimated because of the low sample size  
555 in HUNT. We created genetic relationship matrices (GRMs) based on 358 956 genotyped  
556 autosomal variants in 56 667 individuals with serum iron and TIBC data, and 56 664  
557 individuals with TSP data. We used the respective GRMs with GCTA-GREML (genomic-  
558 relatedness-based restricted maximum-likelihood) to estimate the variance in each variable  
559 that was explained by the genetic variants. We used age, sex, and genotyping batch as  
560 covariates in the analyses, and we transformed the iron trait variables to normality with rank  
561 based inverse normal transformation after regression on age and sex prior to the analyses.

562

### 563 [Genetic correlation between iron traits](#)

564 We used the LDSC software<sup>37</sup> with the iron trait meta-analysis summary statistics and  
565 precomputed LD Scores for Europeans from the 1000 Genomes reference panel<sup>91</sup>, and  
566 estimated the pair-wise genetic correlations of the four iron traits. Prior to the analysis, we  
567 changed all p-values  $< 1 \times 10^{-300}$  to the exact value  $1 \times 10^{-300}$  to make sure the software was  
568 able to read the smallest values and did not discard these SNPs. To ensure that only well  
569 imputed SNPs were included in the analysis and thereby avoid bias due to variable  
570 imputation quality, we filtered the input files to the HapMap3 reference panel prior to the  
571 analysis, as recommended by the software developers ( <https://github.com/bulik/ldsc/> ).

572

### 573 [Phenome-wide association tests \(PheWAS\)](#)

574 We constructed GRSs for the iron status biomarkers by summing the product of the effect  
575 size and the estimated allele count (dosage) for the index variants in genome-wide significant  
576 loci (p-value  $< \times 10^{-8}$ ). We used TOPMed imputed estimated allele counts and effect sizes  
577 from the meta-analysis and calculated the GRS for participants of white British ancestry in  
578 the UK Biobank. We tested the association of the GRSs (GRS-PheWAS) and the individual  
579 index variants (single variant PheWAS) with 1 688 phecodes, continuous traits and blood

580 biomarkers. We used a logistic or linear regression model respectively to assess the  
581 association of the single variant estimated allele counts ('dosage') or inverse normalized GRS  
582 and each phecode or continuous trait/biomarker. For the GRS-PheWAS we included as  
583 covariates sex and birth year for binary traits, and sex and age at measurement for continuous  
584 traits. For the single variant PheWAS we used GWAS summary statistics generated with  
585 SAIGE v.29.4.2<sup>92</sup>, with sex and the first four PCs as covariates in addition to age at initial  
586 assessment for quantitative traits and birth year for binary traits. To correct for multiple  
587 testing, we used a Bonferroni corrected p-value significance cut-off of  $2.4 \times 10^{-7}$ , correcting  
588 for the number of tested variants, phecodes, biomarkers and continuous traits. In total, 29  
589 variants were excluded from the single variant PheWAS and GRS-PheWAS because they  
590 were not imputed in UK Biobank (Supplemental Information, Section II)

591

### 592 Validation of genetic risk scores in HUNT

593 To validate the previously published results from Iceland, Denmark and UK, we created  
594 weighted GRSs for each trait based on the published index variants and effect sizes<sup>17</sup> using  
595 the same approach as described in the previous section. We tested the predictive ability of  
596 each GRS by regressing each trait on the respective GRS in the independent cohort, HUNT  
597 ( $N_{\text{iron}}=N_{\text{TIBC}}=56\ 667$ ,  $N_{\text{TSP}}=56\ 664$ ,  $N_{\text{ferritin}}=2334$ ) and report the trait variance explained by  
598 the GRS. In total, ten variants were excluded from the GRSs because they were not imputed  
599 in HUNT (Supplemental Information, section III).

600

### 601 Mendelian randomization of iron status on all-cause mortality

602 To assess the causal association of iron status on all-cause mortality, we performed linear MR  
603 analyses using the ratio of coefficients method<sup>93</sup>, using GRSs as genetic instruments for the  
604 four iron related traits. The GRSs were constructed as described above, using index variants  
605 and external effect sizes from the previous independent meta-analysis<sup>17</sup>. We used linear  
606 regression to estimate the associations between the iron related traits and the GRS, and a Cox  
607 proportional hazards regression to estimate the association of the GRS with mortality. The  
608 MR estimate was obtained as the ratio of the outcome-instrument and exposure-instrument  
609 association estimates. The standard error was estimated as the standard error of the GRS-  
610 mortality association divided by the GRS-biomarker association estimate.

611 To further assess the shape of the association, we performed a non-linear Mendelian  
612 randomization with the fractional polynomial method<sup>94,95</sup> in HUNT, using the same GRS as

613 genetic instrument for the iron traits. The method has been described in detail elsewhere<sup>95–98</sup>.  
614 In brief, each iron related trait was regressed on its respective GRS, and the population was  
615 divided into 100 (iron, TIBC, TSP) or 20 (ferritin) strata based on the residual traits. The  
616 number of strata was reduced for ferritin because of the lower sample size for this biomarker.  
617 In each stratum we used linear regression to estimate the association of the GRS with the iron  
618 trait, and Cox proportional hazards regression to estimate the association of the GRS with  
619 mortality. We calculated the localized average causal effect (LACE) of the respective trait on  
620 all-cause mortality in each stratum as the ratio of the GRS-outcome and GRS-exposure  
621 associations. We performed meta-regression of the LACE against the mean of the exposure  
622 in each stratum and tested whether the best-fitting fractional polynomial of degree 1 fitted the  
623 LACE estimates better than a linear model using the fractional polynomial method<sup>94</sup>.

624

625 To further validate the selection of SNPs representing each biomarker in the non-linear MR,  
626 we performed post-hoc sensitivity analyses rerunning the non-linear MR method with new  
627 instruments that had stricter criteria for SNP inclusion. Here, we restricted the GRSs to index  
628 variants from the previous study<sup>17</sup> that were not only GWAS significant for at least one trait,  
629 but also nominally significant ( $p$ -value $<0.05$ ) for the remaining traits. Further, we excluded  
630 SNPs that had directions of effect that were not consistent with systemic iron status  
631 (increasing serum iron, ferritin and TSP, and decreasing TIBC)<sup>99</sup>. We used the remaining 14  
632 SNPs (Supplemental Information, Section IV) to construct each of the four GRSs in the  
633 analysis as described for the main analysis.

634

## 635 Ethics

636 All study participants have given informed consent. The analyses in HUNT has approval  
637 from the Norwegian Data Protection Authority and the Regional Ethics Committee for  
638 Medical and Health Research Ethics in Central Norway (REK Reference Number: 2014/144),  
639 the analyses in MGI are approved by the Institutional Review Board of the University of  
640 Michigan Medical School (IRB Reference Number: HUM00094409), and the analyses in UK  
641 Biobank are covered by the ethics approval for UK Biobank studies (application 24460) from  
642 the NHS National Research Ethics Service on 17th June 2011 (Ref 11/NW/0382) and  
643 extended on 10th May 2016 (Ref 16/NW/0274).

644

## 645 Data Availability

646 Data generated or analyzed during this study are available from the corresponding authors  
647 upon reasonable request.

648

## 649 Acknowledgements

650 The Trøndelag Health Study (The HUNT Study) is a collaboration between HUNT Research  
651 Center (Faculty of Medicine and Health Sciences, NTNU, Norwegian University of Science  
652 and Technology), Trøndelag County Council, Central Norway Regional Health Authority,  
653 and the Norwegian Institute of Public Health. The genotyping in HUNT was financed by the  
654 National Institutes of Health; University of Michigan; the Research Council of Norway; the  
655 Liaison Committee for Education, Research, and Innovation in Central Norway; and the Joint  
656 Research Committee between St Olav's hospital and the Faculty of Medicine and Health  
657 Sciences, NTNU. The authors acknowledge the Michigan Genomics Initiative participants,  
658 Precision Health at the University of Michigan, the University of Michigan Medical School  
659 Central Biorepository, and the University of Michigan Advanced Genomics Core for  
660 providing data and specimen storage, management, processing, and distribution services, and  
661 the Center for Statistical Genetics in the Department of Biostatistics at the School of Public  
662 Health for genotype data curation, imputation, and management in support of the research  
663 reported in this publication.

664

## 665 Author Contributions

666 M.R.M analyzed the data and wrote the first draft of the manuscript. A.F.H., S.E.G, S.A.G.T,  
667 K-H.W and W.Z. contributed to analyses. K.T. gave advice on phenotype definitions and  
668 hemochromatosis. S.B., A.M. and D.G. gave advice on non-linear Mendelian randomization.  
669 B.M.B, J.B.N, K.H. and C.J.W conceived and designed the study. All authors interpreted  
670 results and revised the paper.

671

## 672 Competing Interests

673 D.G is employed part-time by Novo Nordisk outside the submitted work. G.R.A. works for  
674 Regeneron Pharmaceuticals. C.J.W.'s spouse works for Regeneron Pharmaceuticals. The  
675 remaining authors have no competing interests to declare.

676

## 677 References

- 678 1. Andrews, N. C. Disorders of iron metabolism. *N. Engl. J. Med.* **341**, 1986–1995  
679 (1999).
- 680 2. Rajpathak, S. N. *et al.* The role of iron in type 2 diabetes in humans. *Biochim. Biophys.*  
681 *Acta - Gen. Subj.* **1790**, 671–681 (2009).
- 682 3. Belaidi, A. A. & Bush, A. I. Iron neurochemistry in Alzheimer’s disease and  
683 Parkinson’s disease: targets for therapeutics. *J. Neurochem.* **139**, 179–197 (2016).
- 684 4. Jáuregui-Lobera, I. Iron deficiency and cognitive functions. *Neuropsychiatr. Dis.*  
685 *Treat.* **10**, 2087–2095 (2014).
- 686 5. Das, I. *et al.* Impact of iron deficiency anemia on cell-mediated and humoral immunity  
687 in children: A case control study. *J. Nat. Sci. Biol. Med.* **5**, 158–163 (2014).
- 688 6. Ahluwalia, N., Sun, J., Krause, D., Mastro, A. & Handte, G. Immune function is  
689 impaired in iron-deficient, homebound, older women. *Am. J. Clin. Nutr.* **79**, 516–521  
690 (2004).
- 691 7. Silva, B. & Faustino, P. An overview of molecular basis of iron metabolism regulation  
692 and the associated pathologies. *Biochim. Biophys. Acta - Mol. Basis Dis.* **1852**, 1347–  
693 1359 (2015).
- 694 8. Gomme, P. T. & McCann, K. B. Transferrin: Structure, function and potential  
695 therapeutic actions. *Drug Discov. Today* **10**, 267–273 (2005).
- 696 9. Wang, W. *et al.* Ferritin H is a novel marker of early erythroid precursors and  
697 macrophages. *Histopathology* **62**, 931–940 (2013).
- 698 10. Koury, M. J. & Ponka, P. New insights into erythropoiesis: The roles of folate, vitamin  
699 B 12, and iron. *Annu. Rev. Nutr.* **24**, 105–131 (2004).
- 700 11. Philpott, C. C. The flux of iron through ferritin in erythrocyte development. *Curr.*  
701 *Opin. Hematol.* **25**, 183–188 (2018).
- 702 12. Pfeiffer, C. M. & Looker, A. C. Laboratory methodologies for indicators of iron  
703 status: strengths, limitations, and analytical challenges. **106**, 1606–1614 (2017).
- 704 13. Lal, A. Iron in Health and Disease: An Update. *Indian J. Pediatr.* **87**, 58–65 (2020).
- 705 14. Abbaspour, N., Hurrell, R. & Kelishadi, R. Review on iron and its importance for  
706 human health. *J. Res. Med. Sci.* **19**, 3–11 (2014).
- 707 15. Finberg, K. E. *et al.* Mutations in *TMPRSS6* cause iron-refractory iron deficiency  
708 anemia (IRIDA). *Nat. Genet.* **40**, 569–571 (2008).

- 709 16. Benyamin, B. *et al.* Variants in TF and HFE Explain ~40% of Genetic Variation in  
710 Serum-Transferrin Levels. *Am. J. Hum. Genet.* **84**, 60–65 (2009).
- 711 17. Bell, S. *et al.* A genome-wide meta-analysis yields 46 new loci associating with  
712 biomarkers of iron homeostasis. *Commun. Biol.* **4**, (2021).
- 713 18. Gill, D. *et al.* Associations of genetically determined iron status across the phenome: A  
714 mendelian randomization study. *PLoS Med.* **16**, 1–16 (2019).
- 715 19. Gill, D. *et al.* Effects of Genetically Determined Iron Status on Risk of Venous  
716 Thromboembolism and Carotid Atherosclerotic Disease: A Mendelian Randomization  
717 Study. *J. Am. Heart Assoc.* **8**, (2019).
- 718 20. Gill, D. *et al.* The Effect of Iron Status on Risk of Coronary Artery Disease: A  
719 Mendelian Randomization Study - Brief Report. *Arterioscler. Thromb. Vasc. Biol.* **37**,  
720 1788–1792 (2017).
- 721 21. Del Greco, F. M. *et al.* Serum iron level and kidney function: A Mendelian  
722 randomization study. *Nephrol. Dial. Transplant.* **32**, 273–278 (2017).
- 723 22. Pichler, I. *et al.* Serum Iron Levels and the Risk of Parkinson Disease: A Mendelian  
724 Randomization Study. *PLoS Med.* **10**, (2013).
- 725 23. Gill, D., Monori, G., Tzoulaki, I. & Dehghan, A. Iron status and risk of stroke: A  
726 Mendelian randomization study. *Stroke* **49**, 2815–2821 (2018).
- 727 24. Taliun, D. *et al.* Sequencing of 53,831 diverse genomes from the NHLBI TOPMed  
728 Program. *Biorxiv* 1–46 (2019).
- 729 25. Krokstad, S. *et al.* Cohort profile: The HUNT study, Norway. *Int. J. Epidemiol.* **42**,  
730 968–977 (2013).
- 731 26. Pilia, G. *et al.* Heritability of cardiovascular and personality traits in 6,148 Sardinians.  
732 *PLoS Genet.* **2**, 1207–1223 (2006).
- 733 27. Hentze, M. W., Muckenthaler, M. U., Galy, B. & Camaschella, C. Two to Tango:  
734 Regulation of Mammalian Iron Metabolism. *Cell* **142**, 24–38 (2010).
- 735 28. Sanchez, M., Galy, B., Muckenthaler, M. U. & Hentze, M. W. Iron-regulatory proteins  
736 limit hypoxia-inducible factor-2 $\alpha$  expression in iron deficiency. *Nat. Struct. Mol. Biol.*  
737 **14**, 420–426 (2007).
- 738 29. Paradkar, P. N., Zumbrennen, K. B., Paw, B. H., Ward, D. M. & Kaplan, J. Regulation  
739 of Mitochondrial Iron Import through Differential Turnover of Mitoferrin 1 and  
740 Mitoferrin 2. *Mol. Cell. Biol.* **29**, 1007–1016 (2009).
- 741 30. Whitfield, J. B. *et al.* Effects of HFE C282Y and H63D polymorphisms and polygenic  
742 background on iron stores in a large community sample of twins. *Am. J. Hum. Genet.*



- 743           **66**, 1246–1258 (2000).
- 744   31. De Tayrac, M. *et al.* Genome-wide association study identifies TF as a significant  
745       modifier gene of iron metabolism in HFE hemochromatosis. *J. Hepatol.* **62**, 664–672  
746       (2015).
- 747   32. Montosi, G. *et al.* Autosomal-dominant hemochromatosis is associated with a mutation  
748       in the ferroportin (SLC11A3) gene. *J. Clin. Invest.* **108**, 619–623 (2001).
- 749   33. Roetto, A. *et al.* Hemochromatosis due to mutations in transferrin receptor 2. *Blood*  
750       *Cells. Mol. Dis.* **29**, 465–470 (2002).
- 751   34. Bogdan, A. R., Miyazawa, M., Hashimoto, K. & Tsuji, Y. Regulators of Iron  
752       Homeostasis: New Players in Metabolism, Cell Death, and Disease. *Trends Biochem.*  
753       *Sci.* **41**, 274–286 (2016).
- 754   35. Benyamin, B. *et al.* Novel loci affecting iron homeostasis and their effects in  
755       individuals at risk for hemochromatosis. *Nat. Commun.* **5**, 5926 (2014).
- 756   36. Yang, J., Lee, S. H., Goddard, M. E. & Visscher, P. M. GCTA: A tool for genome-  
757       wide complex trait analysis. *Am. J. Hum. Genet.* **88**, 76–82 (2011).
- 758   37. Bulik-Sullivan, B. *et al.* LD score regression distinguishes confounding from  
759       polygenicity in genome-wide association studies. *Nat. Genet.* **47**, 291–295 (2015).
- 760   38. Poncelet, L., Dumont, J. E., Miot, F. & De Deken, X. The Dual Oxidase Duox2  
761       stabilized with DuoxA2 in an enzymatic complex at the surface of the cell produces  
762       extracellular H<sub>2</sub>O<sub>2</sub> able to induce DNA damage in an inducible cellular model. *Exp.*  
763       *Cell Res.* **384**, 111620 (2019).
- 764   39. Horton, R. *et al.* Gene map of the extended human MHC. *Nat. Rev. Genet.* **5**, 889–899  
765       (2004).
- 766   40. Gao, X. *et al.* HES6 acts as a transcriptional repressor in myoblasts and can induce the  
767       myogenic differentiation program. *J. Cell Biol.* **154**, 1161–1171 (2001).
- 768   41. Li, Y. *et al.* ZNF322, a novel human C<sub>2</sub>H<sub>2</sub> Krüppel-like zinc-finger protein,  
769       regulates transcriptional activation in MAPK signaling pathways. *Biochem. Biophys.*  
770       *Res. Commun.* **325**, 1383–1392 (2004).
- 771   42. Napolitano, G. & Ballabio, A. TFEB at a glance. *J. Cell Sci.* **129**, 2475–2481 (2016).
- 772   43. Jutabha, P. *et al.* Human sodium phosphate transporter 4 (hNPT4/SLC17A3) as a  
773       common renal secretory pathway for drugs and urate. *J. Biol. Chem.* **285**, 35123–  
774       35132 (2010).
- 775   44. Fleming, J. C. *et al.* Characterization of a murine high-affinity thiamine transporter,  
776       Slc19a2. *Mol. Genet. Metab.* **74**, 273–280 (2001).

- 777 45. Saidu, Y. Physicochemical features of rhodanese: A review. *African J. Biotechnol.* **3**,  
778 370–374 (2004).
- 779 46. Thompson, M. A. *et al.* Human indolethylamine N-methyltransferase: cDNA cloning  
780 and expression, gene cloning, and chromosomal localization. *Genomics* **61**, 285–297  
781 (1999).
- 782 47. Pers, T. H. *et al.* Biological interpretation of genome-wide association studies using  
783 predicted gene functions. *Nat. Commun.* **6**, 5890 (2015).
- 784 48. Yu, T. *et al.* The prognostic value of differentially expressed CYP3A subfamily  
785 members for hepatocellular carcinoma. *Cancer Manag. Res.* **10**, 1713–1726 (2018).
- 786 49. Kichaev, G. *et al.* Leveraging Polygenic Functional Enrichment to Improve GWAS  
787 Power. *Am. J. Hum. Genet.* **104**, 65–75 (2019).
- 788 50. Wei, W. Q. *et al.* Evaluating phecodes, clinical classification software, and ICD-9-CM  
789 codes for phenome-wide association studies in the electronic health record. *PLoS One*  
790 **12**, 1–16 (2017).
- 791 51. Rustad, P. *et al.* The Nordic Reference Interval Project 2000: Recommended reference  
792 intervals for 25 common biochemical properties. *Scand. J. Clin. Lab. Invest.* **64**, 271–  
793 284 (2004).
- 794 52. Astle, W. J. *et al.* The Allelic Landscape of Human Blood Cell Trait Variation and  
795 Links to Common Complex Disease. *Cell* **167**, 1415–1429.e19 (2016).
- 796 53. Fujibayashi, A. *et al.* Human RME-8 is involved in membrane trafficking through  
797 early endosomes. *Cell Struct. Funct.* **33**, 35–50 (2008).
- 798 54. Gunshin, H. *et al.* Slc11a2 is required for intestinal iron absorption and erythropoiesis  
799 but dispensable in placenta and liver. *J. Clin. Invest.* **115**, 1258–1266 (2005).
- 800 55. Karczewski, K. J. *et al.* The mutational constraint spectrum quantified from variation  
801 in 141,456 humans. *Nature* **581**, 434–443 (2020).
- 802 56. Vuckovic, D. *et al.* The Polygenic and Monogenic Basis of Blood Traits and Diseases.  
803 *Cell* **182**, 1214–1231.e11 (2020).
- 804 57. Chen, M. H. *et al.* *Trans-ethnic and Ancestry-Specific Blood-Cell Genetics in 746,667*  
805 *Individuals from 5 Global Populations.* *Cell* vol. 182 (2020).
- 806 58. Oskarsson, G. R. *et al.* Predicted loss and gain of function mutations in ACO1 are  
807 associated with erythropoiesis. *Commun. Biol.* **3**, 1–10 (2020).
- 808 59. Johnson, A. D. *et al.* Genome-wide association meta-analysis for total serum bilirubin  
809 levels. *Hum. Mol. Genet.* **18**, 2700–2710 (2009).
- 810 60. Nielsen, J. B. *et al.* Loss-of-function genomic variants highlight potential therapeutic

- 811 targets for cardiovascular disease. *Nat. Commun.* **11**, (2020).
- 812 61. Sookoian, S. & Pirola, C. J. Liver enzymes, metabolomics and genome-wide  
813 association studies: From systems biology to the personalized medicine. *World J.*  
814 *Gastroenterol.* **21**, 711–725 (2015).
- 815 62. Johansson, C. *et al.* The roles of Jumonji-type oxygenases in human disease.  
816 *Epigenomics* **6**, 89–120 (2014).
- 817 63. Khandia, R. *et al.* A Comprehensive Review of Autophagy and Its Various Roles in  
818 Infectious, Non-Infectious, and Lifestyle Diseases: Current Knowledge and Prospects  
819 for Disease Prevention, Novel Drug Design, and Therapy. *Cells* **8**, 674 (2019).
- 820 64. Law, R. H. P. *et al.* An overview of the serpin superfamily. *Genome Biol.* **7**, 1–11  
821 (2006).
- 822 65. Wang, C. Y., Meynard, D. & Lin, H. Y. The role of TMPRSS6/matriptase-2 in iron  
823 regulation and anemia. *Front. Pharmacol.* **5 MAY**, 1–6 (2014).
- 824 66. Rishi, G. & Subramaniam, V. N. The liver in regulation of iron homeostasis. *Am. J.*  
825 *Physiol. - Gastrointest. Liver Physiol.* **313**, G157–G165 (2017).
- 826 67. Darshan, D. & Anderson, G. J. Interacting signals in the control of hepcidin  
827 expression. *BioMetals* **22**, 77–87 (2009).
- 828 68. Arezes, J. *et al.* Erythroferrone inhibits the induction of hepcidin by BMP6. *Blood* **132**,  
829 1473–1477 (2018).
- 830 69. Armitage, A. E. *et al.* Hepcidin regulation by innate immune and infectious stimuli.  
831 *Blood* **118**, 4129–4139 (2011).
- 832 70. Lin, L. *et al.* Iron transferrin regulates hepcidin synthesis in primary hepatocyte culture  
833 through hemojuvelin and BMP2/4. *Blood* **110**, 2182–2189 (2007).
- 834 71. Pietrangelo, A. Hereditary Hemochromatosis — A New Look at an Old Disease. *N.*  
835 *Engl. J. Med.* **350**, 2383–2397 (2004).
- 836 72. Siow, D., Sunkara, M., Morris, A. & Wattenberg, B. Regulation of de novo  
837 sphingolipid biosynthesis by the ORMDL proteins and sphingosine kinase-1. *Adv.*  
838 *Biol. Regul.* **57**, 42–54 (2015).
- 839 73. Cho, H. P., Nakamura, M. & Clarke, S. D. Cloning, expression, and fatty acid  
840 regulation of the human  $\Delta$ -5 desaturase. *J. Biol. Chem.* **274**, 37335–37339 (1999).
- 841 74. Ferreira, M. A. *et al.* Shared genetic origin of asthma, hay fever and eczema elucidates  
842 allergic disease biology. *Nat. Genet.* **49**, 1752–1757 (2017).
- 843 75. Voight, B. F. *et al.* The Metabochip, a Custom Genotyping Array for Genetic Studies  
844 of Metabolic, Cardiovascular, and Anthropometric Traits. *PLoS Genet.* **8**, 1–12 (2012).

- 845 76. Parkes, M., Cortes, A., Van Heel, D. A. & Brown, M. A. Genetic insights into  
846 common pathways and complex relationships among immune-mediated diseases. *Nat.*  
847 *Rev. Genet.* **14**, 661–673 (2013).
- 848 77. Das, S. *et al.* Next-generation genotype imputation service and methods. *Nat Genet* **48**,  
849 1284–1287 (2016).
- 850 78. Sidore, C. *et al.* Genome sequencing elucidates Sardinian genetic architecture and  
851 augments association analyses for lipid and blood inflammatory markers. *Nat. Genet.*  
852 **47**, 1272–1281 (2015).
- 853 79. Loh, P. R. *et al.* Efficient Bayesian mixed-model analysis increases association power  
854 in large cohorts. *Nat. Genet.* **47**, 284–290 (2015).
- 855 80. Zhan, X., Hu, Y., Li, B., Abecasis, G. R. & Liu, D. J. RVTESTS: An efficient and  
856 comprehensive tool for rare variant association analysis using sequence data.  
857 *Bioinformatics* **32**, 1423–1426 (2016).
- 858 81. Kang, H. M. *et al.* Variance component model to account for sample structure in  
859 genome-wide association studies. *Nat. Genet.* **42**, 348–354 (2010).
- 860 82. Willer, C. J., Li, Y. & Abecasis, G. R. METAL: Fast and efficient meta-analysis of  
861 genomewide association scans. *Bioinformatics* **26**, 2190–2191 (2010).
- 862 83. Kent, W. J. *et al.* The Human Genome Browser at UCSC. *Genome Res.* **12**, 996–1006  
863 (2002).
- 864 84. Buniello, A. *et al.* The NHGRI-EBI GWAS Catalog of published genome-wide  
865 association studies, targeted arrays and summary statistics 2019. *Nucleic Acids Res.*  
866 **47**, D1005–D1012 (2019).
- 867 85. Chang, C. C. *et al.* Second-generation PLINK: Rising to the challenge of larger and  
868 richer datasets. *Gigascience* **4**, 1–16 (2015).
- 869 86. Wang, K., Li, M. & Hakonarson, H. ANNOVAR: Functional annotation of genetic  
870 variants from high-throughput sequencing data. *Nucleic Acids Res.* **38**, 1–7 (2010).
- 871 87. Giambartolomei, C. *et al.* Bayesian Test for Colocalisation between Pairs of Genetic  
872 Association Studies Using Summary Statistics. *PLoS Genet.* **10**, (2014).
- 873 88. Wallace, C. Statistical testing of shared genetic control for potentially related traits.  
874 *Genet. Epidemiol.* **37**, 802–813 (2013).
- 875 89. Weeks, E. M. *et al.* Leveraging polygenic enrichments of gene features to predict  
876 genes underlying complex traits and diseases. *medRxiv* (2020)  
877 doi:10.1101/2020.09.08.20190561.
- 878 90. de Leeuw, C. A., Mooij, J. M., Heskes, T. & Posthuma, D. MAGMA: Generalized

- 879 Gene-Set Analysis of GWAS Data. *PLoS Comput. Biol.* **11**, 1–19 (2015).
- 880 91. Altshuler, D. L. *et al.* A map of human genome variation from population-scale  
881 sequencing. *Nature* **467**, 1061–1073 (2010).
- 882 92. Zhou, W. *et al.* Efficiently controlling for case-control imbalance and sample  
883 relatedness in large-scale genetic association studies. *Nat. Genet.* **50**, 1335–1341  
884 (2018).
- 885 93. Palmer, T. M. *et al.* Instrumental variable estimation of causal risk ratios and causal  
886 odds ratios in mendelian randomization analyses. *Am. J. Epidemiol.* **173**, 1392–1403  
887 (2011).
- 888 94. Staley, J. R. & Burgess, S. Semiparametric methods for estimation of a nonlinear  
889 exposure-outcome relationship using instrumental variables with application to  
890 Mendelian randomization. *Genet. Epidemiol.* **41**, 341–352 (2017).
- 891 95. Burgess, S., Davies, N. M. & Thompson, S. G. Instrumental variable analysis with a  
892 nonlinear exposure-outcome relationship. *Epidemiology* **25**, 877–885 (2014).
- 893 96. Burgess, S. *et al.* Dose–response relationship between genetically proxied average  
894 blood glucose levels and incident coronary heart disease in individuals without  
895 diabetes mellitus. *Diabetologia* **64**, 845–849 (2021).
- 896 97. Malik, R. *et al.* Relationship between Blood Pressure and Incident Cardiovascular  
897 Disease: Linear and Nonlinear Mendelian Randomization Analyses. *Hypertension*  
898 2004–2013 (2021) doi:10.1161/HYPERTENSIONAHA.120.16534.
- 899 98. Sun, Y. Q. *et al.* Body mass index and all cause mortality in HUNT and UK Biobank  
900 studies: Linear and non-linear mendelian randomisation analyses. *BMJ* **364**, 1–10  
901 (2019).
- 902 99. Wish, J. B. Assessing iron status: beyond serum ferritin and transferrin saturation.  
903 *Clin. J. Am. Soc. Nephrol.* **1 Suppl 1**, 4–8 (2006).
- 904
